# Supplementary material for: Making Polyol Gummies by 3D Printing: Effect of Polyols on 3D Printing Characteristics
Source: MDPI journal article supplement (doi:10.3390/foods11060874), 2022-03-18
Supplement: s1 [file s1]

Supplementary Materials

# Making Polyol Gummies by 3D Printing: Effect of Polyols on 3D Printing Characteristics

Hao Le <sup>1</sup>, Xiaorui Wang <sup>1</sup>, Yabo Wei <sup>1</sup>, Yunfeng Zhao <sup>1</sup>, Jian Zhang <sup>1,\*</sup> and Lianfu Zhang <sup>2,\*</sup>

<sup>1</sup> Food College, Shihezi University, Shihezi 832003, China; 20192111005@stu.shzu.edu.cn (H.L.); wangxiaorui0923@163.com (X.W.); 18935813163@163.com (Y.W.); yunfeng@shzu.com.edu.cn (Y.Z.)

<sup>2</sup> School of Food Science and Technology, Jiangnan University, Wuxi 214122, China

\* Correspondence: zhangjian0411@163.com (J.Z.); lianfu@jiangnan.edu.cn (L.Z.); Tel.: +86-189-9773-1657 (J.Z.); +86-138-1219-2381 (L.Z.)

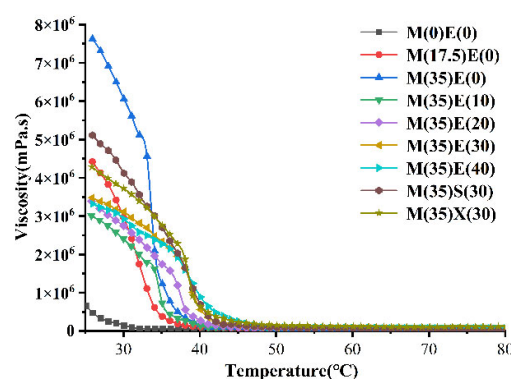

**Figure S1.** Temperature ramp tests with a cooling rate of 1 °C/min for ink of different polyol formulations.

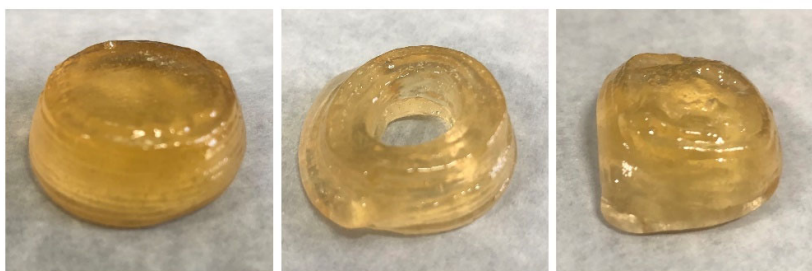

**Figure S2.** Printing photos of control group ink (M(0)E(0)).
